# Supplementary figures and images for: Evaluation of Bacterial Composition and Viability of Equine Feces after Processing for Transplantation
Source: MDPI journal article supplement (doi:10.3390/microorganisms11020231), 2023-01-17

● T0  
● T1  
● T2  
● T3

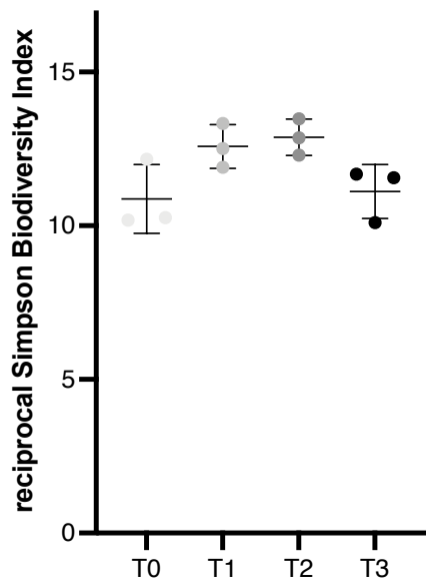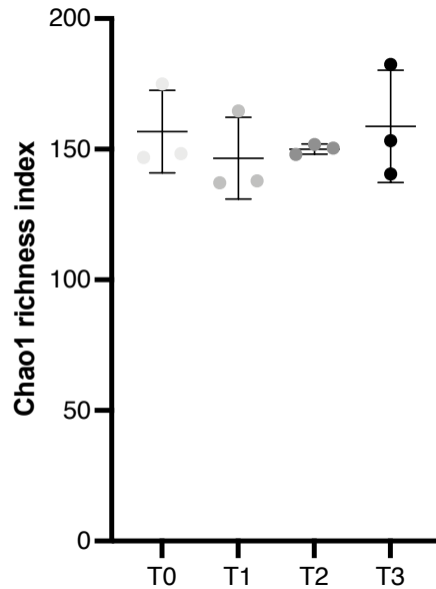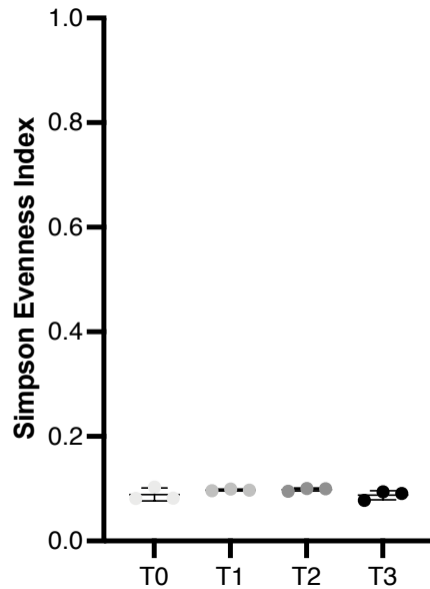

Supplement: s1 [file s1]

NMDS Genus noPMA - (k=2, stress=0.058)

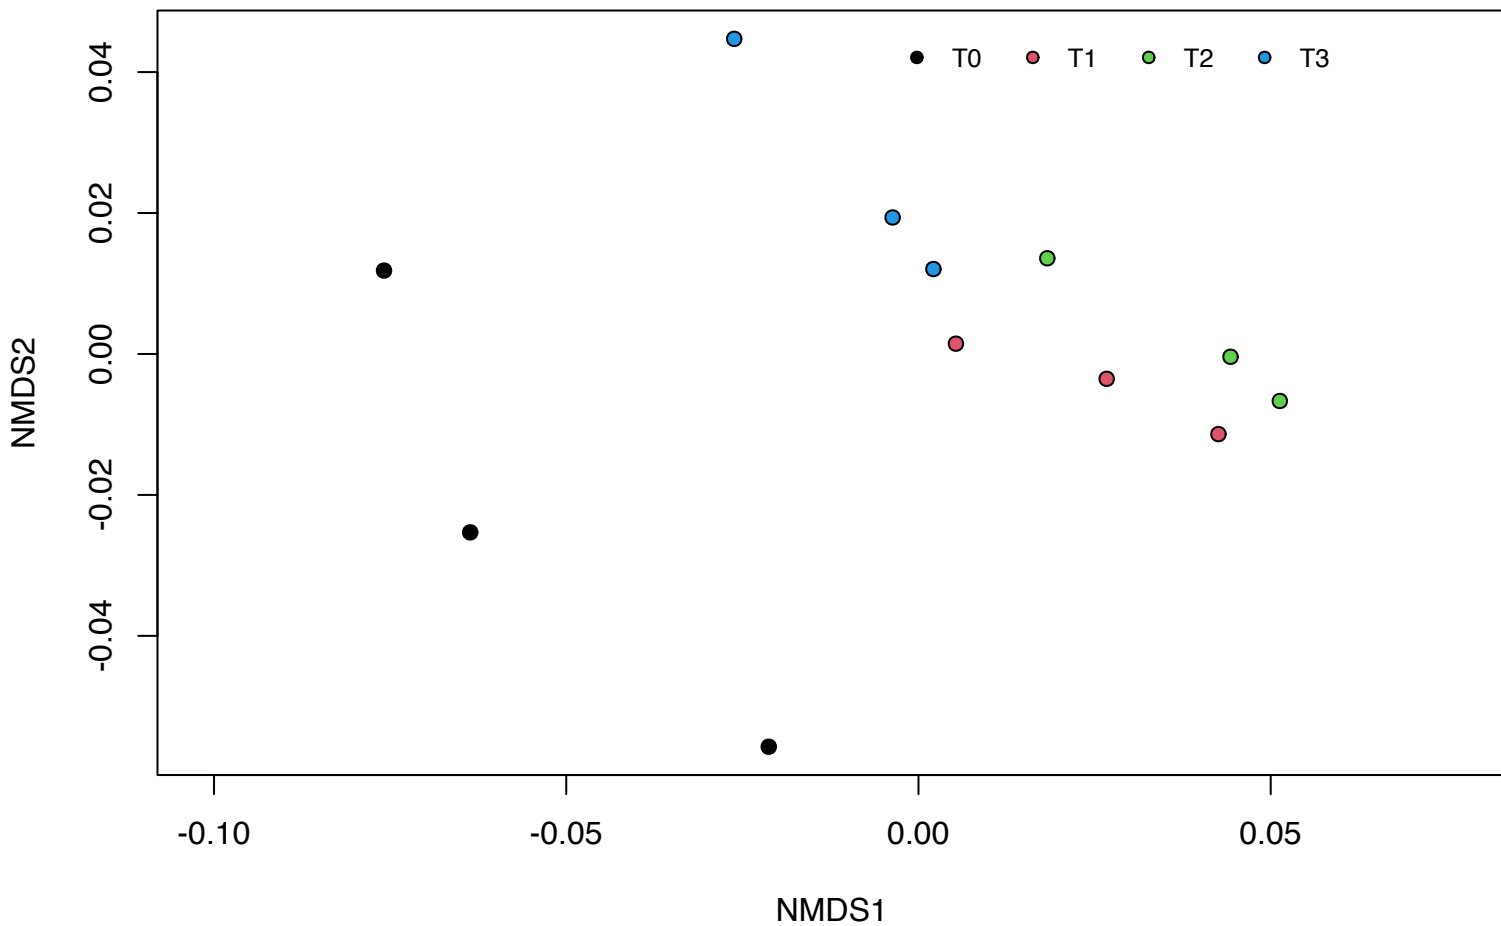

Supplement: s1 [file s1]
